# Supplementary material
Source: PubMed Central journal article supplement (PMC4464744)
Supplement: supp_WNL.0000000000001655_Table_e-1.pdf [file supp_WNL.0000000000001655_Table_e-1.pdf]

**Table e-1: Regions in which the most significant voxels belong.** The volumes of significant (p-value<0.05) voxels in each region are presented as well as the beta and p-value from a regression analysis relating fractional anisotropy and gray-matter density to fasting blood glucose and diabetes in each region, adjusting for age, sex, time between exam 1 and MRI, hypertension and Body mass index.

|              | Fasting Blood Glucose (inverse transformed) |                                  |        |          | Diabetes                     |                                  |          |          |
|--------------|---------------------------------------------|----------------------------------|--------|----------|------------------------------|----------------------------------|----------|----------|
|              | Volume of significant voxels                | Region                           | beta   | p-value  | Volume of significant voxels | Region                           | beta     | p-value  |
| White matter | 46.807875                                   | Total white matter               | 3.1746 | 4.95E-13 | 123.95025                    | Total white matter               | -0.0260  | 3.64E-16 |
|              | 32.018625                                   | White matter tracts              | 3.3992 | 2.72E-13 | 16.35525                     | Short association fibers         | -0.0301  | 1.02E-20 |
|              | 5.79825                                     | Short association fibers         | 3.9772 | 8.37E-18 | 7.776                        | Inferior longitudinal fasciculus | -0.0251  | 1.25E-13 |
|              | 3.736125                                    | Inferior longitudinal fasciculus | 3.3449 | 2.05E-11 | 29.646                       | Corpus callosum                  | -0.0306  | 2.02E-13 |
|              | 3.580875                                    | Thalamic radiations              | 2.8686 | 1.72E-10 | 10.918125                    | Thalamic radiations              | -0.0231  | 2.59E-13 |
|              | 11.194875                                   | Corpus callosum                  | 3.5742 | 4.58E-09 | 5.47425                      | Cingulum of cingulate gyrus      | -0.0295  | 1.35E-12 |
|              | 2.86875                                     | Inferior fronto-occipital tract  | 2.9698 | 1.14E-08 | 7.934625                     | Inferior fronto-occipital tract  | -0.0241  | 2.62E-12 |
|              | 1.231875                                    | Cingulum of cingulate gyrus      | 3.5176 | 2.61E-08 | 5.106375                     | Cortical spinal tract            | -0.0232  | 4.11E-12 |
|              | 2.568375                                    | Cortical spinal tract            | 2.6905 | 1.09E-07 | 1.23525                      | Uncinate fasciculus              | -0.0198  | 3.01E-06 |
|              |                                             |                                  |        |          |                              |                                  |          |          |
| Gray matter  | 42.872625                                   | Total gray matter                | 1.3349 | 1.04E-16 | 114.044625                   | Total gray matter                | -0.0100  | 1.90E-13 |
|              | 4.48875                                     | Brodmann's area_37               | 1.4807 | 3.27E-14 | 3.429                        | Brodmann's area 20               | -0.0093  | 1.70E-16 |
|              | 4.4415                                      | Brodmann's area 19               | 1.3427 | 4.78E-13 | 5.238                        | Brodmann's area 37               | -0.0108  | 8.63E-14 |
|              | 1.3905                                      | Brodmann's area 20               | 1.3332 | 3.12E-12 | 2.980125                     | Brodmann's area 40               | -0.0100  | 1.66E-13 |
|              | 3.364875                                    | Brodmann's area 18               | 1.2692 | 8.23E-11 | 4.303125                     | Brodmann's area 6                | -0.0088  | 8.96E-13 |
|              | 1.528875                                    | Brodmann's area 7                | 1.3364 | 1.81E-10 | 4.107375                     | Brodmann's area 7                | -0.0102  | 3.55E-12 |
|              | 3.364875                                    | Brodmann's area 21               | 1.2662 | 6.84E-10 | 1.593                        | Brodmann's area 9                | -0.0094  | 7.42E-12 |
|              | 1.576125                                    | Brodmann's area 48               | 1.2715 | 5.76E-09 | 5.038875                     | Brodmann's area 19               | -0.0092  | 3.09E-11 |
|              | 1.886625                                    | Brodmann's area 22               | 1.2541 | 3.80E-09 | 2.352375                     | Brodmann's area 45               | -0.0096  | 4.36E-11 |
|              | 2.20725                                     | Brodmann's area 23               | 1.1913 | 9.28E-09 | 2.133                        | Brodmann's area 44               | -0.0096  | 6.18E-11 |
|              | 2.291625                                    | Brodmann's area 39               | 1.3023 | 4.93E-08 | 1.576125                     | Brodmann's area 38               | -0.0070  | 1.38E-10 |
|              | 2.66625                                     | Brodmann's area 17               | 1.3266 | 2.47E-07 | 5.281875                     | Brodmann's area 21               | -0.0085  | 2.55E-10 |
|              |                                             |                                  |        |          | 3.074625                     | Brodmann's area 22               | -0.0091  | 3.49E-10 |
|              |                                             |                                  |        |          | 5.1975                       | Brodmann's area 18               | -0.0091  | 6.63E-10 |
|              |                                             |                                  |        |          | 1.886625                     | Brodmann's area 47               | -0.0082  | 3.80E-09 |
|              |                                             |                                  |        |          | 2.028375                     | Brodmann's area 11               | -0.0080  | 4.46E-09 |
|              |                                             |                                  |        |          | 2.203875                     | Brodmann's area 32               | -0.0096  | 7.05E-09 |
|              |                                             |                                  |        |          | 2.001375                     | Brodmann's area 43               | -0.0087  | 7.81E-09 |
|              |                                             |                                  |        |          | 3.5235                       | Brodmann's area 39               | -0.0090  | 1.51E-08 |
|              |                                             |                                  |        |          | 1.14075                      | Brodmann's area 46               | -0.0106  | 2.26E-08 |
|              |                                             |                                  |        |          | 1.89                         | Brodmann's area 10               | -0.0085  | 3.40E-08 |
|              |                                             |                                  |        |          | 2.372625                     | Brodmann's area 48               | -0.0088  | 6.51E-08 |
|              |                                             |                                  |        | 4.3065   | Brodmann's area 17           | -0.0097                          | 8.84E-08 |          |
|              |                                             |                                  |        | 1.738125 | Brodmann's area 23           | -0.0086                          | 2.16E-07 |          |

Fibre labels according to the Johns Hopkins University probabilistic fibre map atlases (Zhang Y, Zhang J, Oishi K, Faria AV, Jiang H, Li X, Akhter K, Rosa-Neto P, Pike GB, Evans A, Toga AW, Woods R, Mazziotta JC, Miller MI, van Zijl PC, Mori S. Atlas-guided tract reconstruction for automated and comprehensive examination of the white matter anatomy. Neuroimage. 2010;52(4):1289-1301).
