# Supplementary material
Source: PubMed Central journal article supplement (PMC4464744)

**Figure e-1:** A flow diagram of study participants.

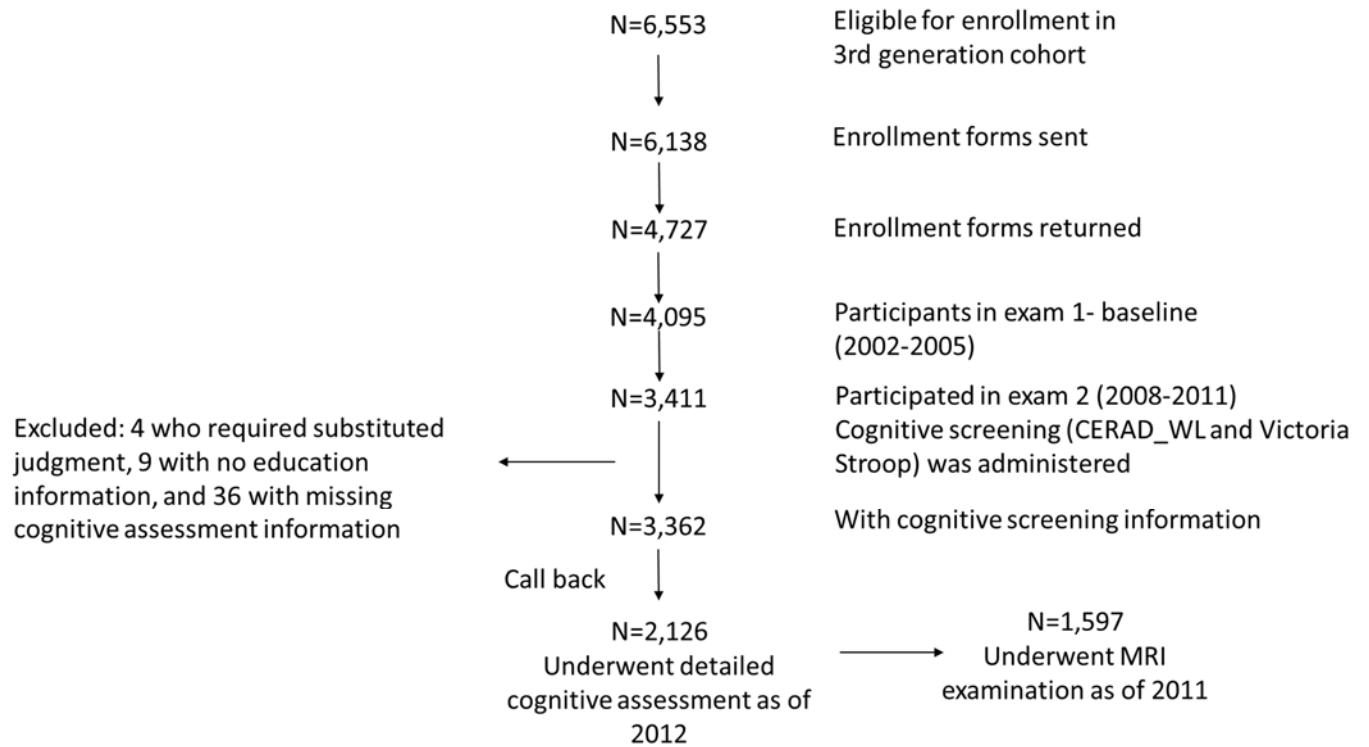

Supplement: supp_WNL.0000000000001655_Figure_e-1.pdf [file supp_WNL.0000000000001655_Figure_e-1.pdf]
